# Supplementary material for: Effects of electrolytes on the capacitive behavior of nitrogen/phosphorus co-doped nonporous carbon nanofibers: an insight into the role of phosphorus groups
Source: Royal Society of Chemistry journal article supplement (doi:10.1039/c4ra02299h), 2014-01-01
Supplement: c4ra02299h1.pdf [file c4ra02299h1.pdf]

Electronic Supplementary Information (ESI) for

**Effects of electrolytes on the capacitive behaviors of  
nitrogen/phosphorus co-doped nonporous carbon nanofibers:  
Insight into the role of phosphorus groups**

Xiaodong Yan, Yunhua Yu\* and Xiaoping Yang

State Key Laboratory of Organic-Inorganic Composites, Beijing University of Chemical  
Technology, Beijing 100029, China

**Experimental details**

**1. Fabrication of N/P-NPCNFs**

The fabrication of N/P-NPCNFs was according to our previous method.<sup>1</sup> Typically, 2.0 g PAN ( $M_w=100,000$  g mol<sup>-1</sup>, UK Courtaulds Co.) and 0.4 g phosphoric acid (H<sub>3</sub>PO<sub>4</sub>, 85 wt% in water, Beijing Chemical Co.) were dissolved into 16 mL N, N-dimethyl formamide (DMF, Beijing Chemical Co.). Then electrospinning was carried out at an electrostatic voltage of 16 kV. The as-prepared nanofiber webs were stabilized at 280 °C for 2 h with a heating rate of 3 °C min<sup>-1</sup> in air, and subsequently carbonized at 800 °C for 2 h with the ramping rate of 5 °C min<sup>-1</sup> in nitrogen. The sample was denoted as N/P-NPCNFs. For comparison, pure carbon nanofibers (N-NPCNFs) derived from pure PAN were prepared under the same conditions.

## **2.2. Characterization**

The morphology of the precursor nanofibers was characterized by a field emission scanning electron microscope (FE-SEM, Supra55, Carl Zeiss). The X-ray photoelectron spectroscopy (XPS, EscaLab 250, Thermo Fisher Scientific) was used to investigate the surface chemistry.

## **2.3. Electrochemical measurements**

To prepare the electrodes, a mixture of the sample and polyvinylidene fluoride binder with the weight percent ratio of 90:10 was dispersed in 1-Methyl-2-pyrrolidone, and then the slurry was coated on the platinum current collectors. Afterwards, the electrodes were dried in a vacuum oven at 120 °C for 24 h. The loading mass of the active materials on each platinum plate was  $\sim 3.0 \text{ mg cm}^{-2}$ . The electrochemical measurements were carried out in a three-electrode system with a reference electrode of Ag/AgCl and a counter electrode of platinum plate in different electrolytes (1 M H<sub>2</sub>SO<sub>4</sub>, 0.5 M Li<sub>2</sub>SO<sub>4</sub>, 1 M Na<sub>2</sub>SO<sub>4</sub> and 0.5 M K<sub>2</sub>SO<sub>4</sub>). Cyclic voltammetry (CV) and electrochemical impedance spectroscopy (EIS) measurements were carried out on an electrochemical workstation (Autolab PGSTAT 302N, Metrohm). The galvanostatic charge/discharge processes were conducted on a LAND CT2001A battery tester.

## **References**

[1] X. Yan, Y. Liu, X. Fan, X. Jia, Y. Yu and X. Yang, *J. Power Sources*, 2014, 248, 745.
